# Supplementary material for: Awareness and uptake of layered HIV prevention programming for young women: analysis of population-based surveys in three DREAMS settings in Kenya and South Africa
Source: BMC Public Health. 2019 Oct 30;19:1417. doi: 10.1186/s12889-019-7766-1 (PMC6824290; doi:10.1186/s12889-019-7766-1)
Supplement: Supplementary file 3 — Additional file 3. Characteristics of men aged 15–49 and women aged 25–49 years in Nairobi, uMkhanyakude and Gem general population surveys. [file 12889_2019_7766_MOESM3_ESM.xlsx]

## Sheet: Sheet1
Additional file 3. Characteristics of men aged 15-49 and women aged 25-49 in Nairobi, uMkhanyakude and Gem general population surveys
	Nairobi, Kenya						uMkhanyakude, South Africa				Gem, Kenya
	Males aged 15-34		Males aged 35-49		Females aged 25-49		Males aged 15-34		Males aged 35-49		Males aged 15-34		Males aged 35-49		Females aged 25-49
Characteristics of Men and Women in general population cohorts	Total		Total		Total		Total		Total		Total		Total		Total
	N=3283	%	N=1478	%	N=4426	%	n=2463	%	n=590	%	n=2168	%	n=697	%	n=2548	%
DREAMS awareness
Heard of DREAMS	1270	38.7	501	33.9	2838	64.1					276	12.8	76	11	514	20.3
Not heard of DREAMS	2013	61.3	977	66.1	1588	35.9					1881	87.2	618	89	2014	79.7
Age group
15-19	728	22.1748					1147	46.6			784	36.1624
20-24	971	29.5766					613	24.9			592	27.3063
25-29	862	26.2565			1337	30.2079	374	15.2			404	18.6347			677	26.6
30-34	722	21.9921			1196	27.0221	329	13.4			388	17.8967			602	23.6
35-39			608	41.1367	879	19.8599			236	40			272	39.0244	456	17.9
40-44			510	34.5061	596	13.4659			200	33.9			248	35.5811	433	17
45-49			360	24.3572	418	9.44419			154	26.1			177	25.3945	380	14.9
Marital status*
Never	1756	53.5203	18	1.21869	327	7.38816	985	99.5	137	85.1	1485	68.6864	45	6.50289	172	6.8
Previously married/living with partner	122	3.71838	115	7.78605	1068	24.1301	5	0.5	24	14.9	64	2.96022	88	12.7168	371	14.6
Currently married/living with partner	1403	42.7614	1344	90.9953	3031	68.4817					613	28.3534	559	80.7803	1992	78.6
Education*
None (+ not completed primary 1)	16	0.487359	22	1.4885	253	5.71622	159	12.1	18	6.7	15	0.693802	8	1.14943	65	2.6
Currently in school**	724	22.053	28	1.89445	81	1.83009	656	50.1	0	0	462	21.3691	0	0	5	0.2
Not in school, completed at least some primary	828	25.2208	715	48.3762	2466	55.7162	19	1.5	19	7.1	989	45.7447	481	69.1092	1971	77.6
Not in school, completed at least some secondary	1398	42.583	591	39.9865	1350	30.5016	436	33.3	208	77.6	578	26.7345	174	25	427	16.8
Not in school, completed at least some tertiary	317	9.6558	122	8.2544	275	6.21329	40	3.1	23	8.6	118	5.45791	33	4.74138	72	2.8
Employment
No	693	21.1087	31	2.09743	605	13.6692	1276	77.6	344	58.4	1068	49.6513	30	4.33526	435	17.26
Yes (not recent)	343	10.4478	78	5.2774	990	22.3678	6	0.4	8	1.4
Yes (current/recent in last month)	2247	68.4435	1369	92.6252	2831	63.9629	362	22	237	40.2	1083	50.3487	662	95.6647	2086	82.74
Site (Nairobi)
Korogocho	1456	44.3497	537	36.3329	2142	48.3958
Viwandani	1827	55.6503	941	63.6671	2284	51.6042
Residence area
Rural							912	37.3	220	37.7
Peri-urban							1387	56.8	305	52.2
Urban							145	5.9	59	10.1
*uMkhanyakude: Sample sizes available for males aged 15-49 responding to questions on marital status, education and employment were n=1151, n=1578 and n=2233 respectively.
**Gem: question on current schooling only asked to a subset of adolescents aged 13-17 years
